# Supplementary material for: Allergenicity evaluation of peptides from milk and yogurt after gastrointestinal digestion based on epitopes
Source: Royal Society of Chemistry journal article supplement (doi:10.1039/d2fo02188a), 2022-01-01

**Supplement Table 1.** T cell epitopes prediction on potential peptide-HLA complexes of major allergens-derived peptides with percentile rank < 3% (Low percentile rank = good binders) through IEDB. (ALA with percentile rank < 5%)

| <b>Protein</b> | <b>Allele</b>             | <b>Start</b> | <b>End</b> | <b>Peptide</b>  | <b>Percentile Rank</b> |
|----------------|---------------------------|--------------|------------|-----------------|------------------------|
| <b>BLG</b>     | HLA-DPA1*02:01/DPB1*14:01 | 135          | 149        | KFDKALKALPMHIRL | 0.41                   |
|                | HLA-DPA1*02:01/DPB1*14:01 | 136          | 150        | FDKALKALPMHIRLS | 0.45                   |
|                | HLA-DPA1*02:01/DPB1*14:01 | 134          | 148        | EKFDKALKALPMHIR | 0.73                   |
|                | HLA-DPA1*02:01/DPB1*14:01 | 137          | 151        | DKALKALPMHIRLSF | 0.76                   |
|                | HLA-DRB1*03:01            | 91           | 105        | KVLVLDTDYKKYLLF | 0.87                   |
|                | HLA-DRB1*03:01            | 90           | 104        | NKVLVLDTDYKKYLL | 0.87                   |
|                | HLA-DRB1*09:01            | 16           | 30         | AGTWYSLAMAASDIS | 0.89                   |
|                | HLA-DPA1*02:01/DPB1*14:01 | 138          | 152        | KALKALPMHIRLSFN | 0.91                   |
|                | HLA-DRB1*03:01            | 89           | 103        | ENKVLVLDTDYKKYL | 0.94                   |
|                | HLA-DRB1*09:01            | 17           | 31         | GTWYSLAMAASDISL | 1.10                   |
|                | HLA-DPA1*02:01/DPB1*14:01 | 133          | 147        | LEKFDKALKALPMHI | 1.10                   |
|                | HLA-DRB1*04:01            | 142          | 156        | ALPMHIRLSFNPTQL | 1.20                   |
| <b>BLG</b>     | HLA-DRB1*04:01            | 143          | 157        | LPMHIRLSFNPTQLE | 1.20                   |

| <b>Protein</b> | <b>Allele</b>             | <b>Start</b> | <b>End</b> | <b>Peptide</b>  | <b>Percentile Rank</b> |
|----------------|---------------------------|--------------|------------|-----------------|------------------------|
| <b>BLG</b>     | HLA-DRB1*04:01            | 145          | 159        | MHIRLSFNPTQLEEQ | 1.20                   |
|                | HLA-DRB1*04:01            | 144          | 158        | PMHIRLSFNPTQLEE | 1.20                   |
|                | HLA-DPA1*02:01/DPB1*05:01 | 97           | 111        | TDYKKYLLFCMENZA | 1.30                   |
|                | HLA-DRB1*09:01            | 18           | 32         | TWYSLAMAASDISLL | 1.30                   |
|                | HLA-DRB1*09:01            | 15           | 29         | VAGTWYSLAMAASDI | 1.30                   |
|                | HLA-DQA1*03:01/DQB1*03:02 | 14           | 28         | KVAGTWYSLAMAASD | 1.50                   |
|                | HLA-DPA1*02:01/DPB1*05:01 | 93           | 107        | LVLDTDYKKYLLFCM | 1.50                   |
|                | HLA-DPA1*02:01/DPB1*05:01 | 96           | 110        | DTDYKKYLLFCMENS | 1.60                   |
|                | HLA-DRB1*04:01            | 146          | 160        | HIRLSFNPTQLEEQC | 1.60                   |
|                | HLA-DRB1*01:01            | 18           | 32         | TWYSLAMAASDISLL | 1.60                   |
|                | HLA-DRB1*04:05            | 100          | 114        | KKYLLFCMENSAEPE | 1.70                   |
|                | HLA-DRB1*01:01            | 17           | 31         | GTWYSLAMAASDISL | 1.90                   |
|                | HLA-DRB1*09:01            | 14           | 28         | KVAGTWYSLAMAASD | 1.90                   |
|                | HLA-DQA1*03:01/DQB1*03:02 | 15           | 29         | VAGTWYSLAMAASDI | 1.90                   |
|                | HLA-DPA1*02:01/DPB1*05:01 | 94           | 108        | VLDTDYKKYLLFCME | 2.00                   |
|                | HLA-DRB1*04:05            | 99           | 113        | YKKYLLFCMENSAEP | 2.10                   |

| <b>Protein</b> | <b>Allele</b>             | <b>Start</b> | <b>End</b> | <b>Peptide</b>  | <b>Percentile Rank</b> |
|----------------|---------------------------|--------------|------------|-----------------|------------------------|
| <b>BLG</b>     | HLA-DQA1*01:01/DQB1*05:01 | 96           | 110        | DTDYKKYLLFCMENS | 2.20                   |
|                | HLA-DQA1*01:01/DQB1*05:01 | 98           | 112        | DYKKYLLFCMENSAE | 2.20                   |
|                | HLA-DQA1*01:01/DQB1*05:01 | 100          | 114        | KKYLLFCMENSAEPE | 2.20                   |
|                | HLA-DPA1*02:01/DPB1*05:01 | 95           | 109        | LDTDYKKYLLFCMEN | 2.20                   |
|                | HLA-DQA1*01:01/DQB1*05:01 | 97           | 111        | TDYKKYLLFCMENZA | 2.20                   |
|                | HLA-DQA1*01:01/DQB1*05:01 | 99           | 113        | YKKYLLFCMENSAEP | 2.20                   |
|                | HLA-DRB1*04:05            | 101          | 115        | KYLLFCMENSAEPEQ | 2.30                   |
|                | HLA-DRB3*02:02            | 145          | 159        | MHIRLSFNPTQLEEQ | 2.30                   |
|                | HLA-DQA1*03:01/DQB1*03:02 | 16           | 30         | AGTWYSLAMAASDIS | 2.40                   |
|                | HLA-DQA1*01:02/DQB1*06:02 | 14           | 28         | KVAGTWYSLAMAASD | 2.40                   |
|                | HLA-DRB1*03:01            | 93           | 107        | LVLDTDYKKYLLFCM | 2.40                   |
|                | HLA-DRB3*02:02            | 144          | 158        | PMHIRLSFNPTQLEE | 2.40                   |
|                | HLA-DQA1*01:02/DQB1*06:02 | 13           | 27         | QKVAGTWYSLAMAAS | 2.40                   |
|                | HLA-DRB1*03:01            | 92           | 106        | VLVLDTDYKKYLLFC | 2.40                   |
|                | HLA-DRB1*04:05            | 17           | 31         | GTWYSLAMAASDISL | 2.50                   |
|                | HLA-DRB1*04:01            | 141          | 155        | KALPMHIRLSFNPTQ | 2.50                   |

| <b>Protein</b> | <b>Allele</b>             | <b>Start</b> | <b>End</b> | <b>Peptide</b>  | <b>Percentile Rank</b> |
|----------------|---------------------------|--------------|------------|-----------------|------------------------|
| <b>BLG</b>     | HLA-DRB3*02:02            | 143          | 157        | LPMHIRLSFNPTQLE | 2.50                   |
|                | HLA-DQA1*01:02/DQB1*06:02 | 15           | 29         | VAGTWYSLAMAASDI | 2.50                   |
|                | HLA-DRB1*01:01            | 19           | 33         | WYSLAMAASDISLLD | 2.50                   |
|                | HLA-DQA1*03:01/DQB1*03:02 | 17           | 31         | GTWYSLAMAASDISL | 2.60                   |
|                | HLA-DQA1*04:01/DQB1*04:02 | 14           | 28         | KVAGTWYSLAMAASD | 2.60                   |
|                | HLA-DRB1*03:01            | 88           | 102        | NENKVLVLDTDYKKY | 2.60                   |
|                | HLA-DRB1*04:05            | 16           | 30         | AGTWYSLAMAASDIS | 2.70                   |
|                | HLA-DRB3*01:01            | 79           | 93         | PAVFKIDALNENKVL | 2.70                   |
|                | HLA-DQA1*04:01/DQB1*04:02 | 18           | 32         | TWYSLAMAASDISLL | 2.70                   |
|                | HLA-DQA1*04:01/DQB1*04:02 | 15           | 29         | VAGTWYSLAMAASDI | 2.70                   |
|                | HLA-DRB1*09:01            | 19           | 33         | WYSLAMAASDISLLD | 2.70                   |
|                | HLA-DRB3*01:01            | 80           | 94         | AVFKIDALNENKVLV | 2.80                   |
|                | HLA-DQA1*03:01/DQB1*03:02 | 18           | 32         | TWYSLAMAASDISLL | 2.80                   |
|                | HLA-DRB1*04:05            | 18           | 32         | TWYSLAMAASDISLL | 2.80                   |
|                | HLA-DRB1*04:05            | 15           | 29         | VAGTWYSLAMAASDI | 2.80                   |
|                | HLA-DQA1*03:01/DQB1*03:02 | 102          | 116        | YLLFCMENSAPPEQS | 2.80                   |

| <b>Protein</b> | <b>Allele</b>             | <b>Start</b> | <b>End</b> | <b>Peptide</b>  | <b>Percentile Rank</b> |
|----------------|---------------------------|--------------|------------|-----------------|------------------------|
|                | HLA-DRB3*01:01            | 78           | 92         | IPAVFKIDALNENKV | 2.90                   |
|                | HLA-DRB3*01:01            | 77           | 91         | KIPAVFKIDALNENK | 2.90                   |
|                | HLA-DRB3*01:01            | 76           | 90         | TKIPAVFKIDALNEN | 2.90                   |
|                | HLA-DQA1*04:01/DQB1*04:02 | 16           | 30         | AGTWYSLAMAASDIS | 3.00                   |
|                | HLA-DRB1*01:01            | 16           | 30         | AGTWYSLAMAASDIS | 3.00                   |
|                | HLA-DPA1*02:01/DPB1*14:01 | 139          | 153        | ALKALPMHIRLSFNP | 3.00                   |
|                | HLA-DRB1*04:05            | 14           | 28         | KVAGTWYSLAMAASD | 3.00                   |
|                | HLA-DRB4*01:01            | 143          | 157        | LPMHIRLSFNPTQLE | 3.00                   |
| <b>Protein</b> | <b>Allele</b>             | <b>Start</b> | <b>End</b> | <b>Peptide</b>  | <b>Percentile Rank</b> |
| <b>ALA</b>     | HLA-DRB1*07:01            | 98           | 112        | KVGINYWLAHKALCS | 2.80                   |
|                | HLA-DRB1*07:01            | 101          | 115        | INYWLAHKALCSEKL | 3.00                   |
|                | HLA-DRB1*15:01            | 10           | 24         | RELKDLKGYGGVSLP | 3.10                   |
|                | HLA-DRB1*07:01            | 99           | 113        | VGINYWLAHKALCSE | 3.10                   |
|                | HLA-DRB3*02:02            | 49           | 63         | EYGLFQINNKIWCKN | 3.30                   |
|                | HLA-DRB1*07:01            | 100          | 114        | GINYWLAHKALCSEK | 3.60                   |
|                | HLA-DRB1*15:01            | 11           | 25         | ELKDLKGYGGVSLPE | 3.80                   |

| <b>Protein</b>                         | <b>Allele</b>             | <b>Start</b> | <b>End</b> | <b>Peptide</b>  | <b>Percentile Rank</b> |
|----------------------------------------|---------------------------|--------------|------------|-----------------|------------------------|
| <b>ALA</b>                             | HLA-DRB3*02:02            | 50           | 64         | YGLFQINNKIWCKND | 3.80                   |
|                                        | HLA-DRB3*02:02            | 48           | 62         | TEYGLFQINNKIWCK | 3.90                   |
|                                        | HLA-DRB1*07:01            | 102          | 116        | NYWLAHKALCSEKLD | 4.20                   |
|                                        | HLA-DRB1*15:01            | 9            | 23         | FRELKDLKGYGGVSL | 4.30                   |
|                                        | HLA-DRB1*15:01            | 12           | 26         | LKDLKGYGGVSLPEW | 4.30                   |
|                                        | HLA-DRB3*02:02            | 101          | 115        | INYWLAHKALCSEKL | 4.40                   |
|                                        | HLA-DPA1*02:01/DPB1*05:01 | 1            | 15         | EQLTKCEVFRELKDL | 4.60                   |
|                                        | HLA-DQA1*03:01/DQB1*03:02 | 31           | 45         | FHTSGYDTEAIVQNN | 4.70                   |
|                                        | HLA-DRB3*02:02            | 100          | 114        | GINYWLAHKALCSEK | 4.80                   |
|                                        | HLA-DQA1*03:01/DQB1*03:02 | 33           | 47         | TSGYDTEAIVQNNS  | 4.80                   |
| <b>Protein</b>                         | <b>Allele</b>             | <b>Start</b> | <b>End</b> | <b>Peptide</b>  | <b>Percentile Rank</b> |
| <b><math>\alpha_{S1}</math>-casein</b> | HLA-DPA1*01:03/DPB1*04:01 | 141          | 155        | ELAYFYPELFRQFYQ | 0.01                   |
|                                        | HLA-DPA1*01:03/DPB1*04:01 | 18           | 32         | ENLLRFFVAPFPEVF | 0.01                   |
|                                        | HLA-DPA1*01:03/DPB1*04:01 | 142          | 156        | LAYFYPELFRQFYQL | 0.01                   |
|                                        | HLA-DPA1*01:03/DPB1*04:01 | 139          | 153        | NQELAYFYPELFRQF | 0.01                   |
| <b><math>\alpha_{S1}</math>-casein</b> | HLA-DPA1*01:03/DPB1*04:01 | 140          | 154        | QELAYFYPELFRQFY | 0.01                   |

| Protein                                        | Allele                    | Start | End | Peptide         | Percentile Rank |
|------------------------------------------------|---------------------------|-------|-----|-----------------|-----------------|
| <b><math>\alpha</math><sub>S1</sub>-casein</b> | HLA-DPA1*01:03/DPB1*04:01 | 20    | 34  | LLRFFVAPFPEVFGK | 0.02            |
|                                                | HLA-DPA1*01:03/DPB1*04:01 | 19    | 33  | NLLRFFVAPFPEVFG | 0.02            |
|                                                | HLA-DPA1*01:03/DPB1*04:01 | 143   | 157 | AYFYPELFRQFYQLD | 0.06            |
|                                                | HLA-DPA1*01:03/DPB1*04:01 | 17    | 31  | NENLLRFFVAPFPEV | 0.06            |
|                                                | HLA-DPA1*01:03/DPB1*04:01 | 21    | 35  | LRFFVAPFPEVFGKE | 0.10            |
|                                                | HLA-DPA1*01:03/DPB1*04:01 | 138   | 152 | VNQELAYFYPELFRQ | 0.10            |
|                                                | HLA-DPA1*02:01/DPB1*14:01 | 20    | 34  | LLRFFVAPFPEVFGK | 0.20            |
|                                                | HLA-DPA1*02:01/DPB1*14:01 | 18    | 32  | ENLLRFFVAPFPEVF | 0.23            |
|                                                | HLA-DPA1*02:01/DPB1*14:01 | 19    | 33  | NLLRFFVAPFPEVFG | 0.24            |
|                                                | HLA-DPA1*02:01/DPB1*05:01 | 140   | 154 | QELAYFYPELFRQFY | 0.24            |
|                                                | HLA-DPA1*01:03/DPB1*04:01 | 144   | 158 | YFYPELFRQFYQLDA | 0.26            |
|                                                | HLA-DPA1*01:03/DPB1*02:01 | 18    | 32  | ENLLRFFVAPFPEVF | 0.30            |
|                                                | HLA-DPA1*01:03/DPB1*02:01 | 19    | 33  | NLLRFFVAPFPEVFG | 0.30            |
|                                                | HLA-DPA1*02:01/DPB1*05:01 | 142   | 156 | LAYFYPELFRQFYQL | 0.31            |
|                                                | HLA-DPA1*01:03/DPB1*02:01 | 20    | 34  | LLRFFVAPFPEVFGK | 0.32            |
|                                                | HLA-DPA1*01:03/DPB1*02:01 | 17    | 31  | NENLLRFFVAPFPEV | 0.32            |

| Protein                                        | Allele                    | Start | End | Peptide         | Percentile Rank |
|------------------------------------------------|---------------------------|-------|-----|-----------------|-----------------|
| <b><math>\alpha</math><sub>S1</sub>-casein</b> | HLA-DPA1*02:01/DPB1*05:01 | 141   | 155 | ELAYFYPELFRQFYQ | 0.33            |
|                                                | HLA-DPA1*02:01/DPB1*05:01 | 139   | 153 | NQELAYFYPELFRQF | 0.35            |
|                                                | HLA-DQA1*01:01/DQB1*05:01 | 137   | 151 | GVNQELAYFYPELFR | 0.38            |
|                                                | HLA-DQA1*01:01/DQB1*05:01 | 138   | 152 | VNQELAYFYPELFRQ | 0.38            |
|                                                | HLA-DQA1*01:01/DQB1*05:01 | 139   | 153 | NQELAYFYPELFRQF | 0.41            |
|                                                | HLA-DPA1*02:01/DPB1*01:01 | 142   | 156 | LAYFYPELFRQFYQL | 0.42            |
|                                                | HLA-DPA1*02:01/DPB1*01:01 | 141   | 155 | ELAYFYPELFRQFYQ | 0.44            |
|                                                | HLA-DPA1*02:01/DPB1*01:01 | 139   | 153 | NQELAYFYPELFRQF | 0.44            |
|                                                | HLA-DQA1*01:01/DQB1*05:01 | 147   | 161 | PELFRQFYQLDAYPS | 0.44            |
|                                                | HLA-DPA1*02:01/DPB1*01:01 | 140   | 154 | QELAYFYPELFRQFY | 0.44            |
|                                                | HLA-DQA1*01:01/DQB1*05:01 | 146   | 160 | YPELFRQFYQLDAYP | 0.44            |
|                                                | HLA-DQA1*01:01/DQB1*05:01 | 148   | 162 | ELFRQFYQLDAYPSG | 0.45            |
|                                                | HLA-DPA1*01:03/DPB1*04:01 | 22    | 36  | RFFVAPFPEVFGKEK | 0.46            |
|                                                | HLA-DQA1*01:01/DQB1*05:01 | 136   | 150 | IGVNQELAYFYPEL  | 0.51            |
|                                                | HLA-DQA1*01:01/DQB1*05:01 | 140   | 154 | QELAYFYPELFRQFY | 0.51            |
|                                                | HLA-DPA1*01:03/DPB1*04:01 | 137   | 151 | GVNQELAYFYPELFR | 0.52            |



| Protein                                        | Allele                    | Start | End | Peptide         | Percentile Rank |
|------------------------------------------------|---------------------------|-------|-----|-----------------|-----------------|
| <b><math>\alpha</math><sub>S1</sub>-casein</b> | HLA-DPA1*02:01/DPB1*01:01 | 138   | 152 | VNQELAYFYPELFRQ | 0.55            |
|                                                | HLA-DPA1*02:01/DPB1*14:01 | 21    | 35  | LRFFVAPFPEVFGKE | 0.60            |
|                                                | HLA-DQA1*01:01/DQB1*05:01 | 18    | 32  | ENLLRFFVAPFPEVF | 0.66            |
|                                                | HLA-DPA1*01:03/DPB1*02:01 | 142   | 156 | LAYFYPELFRQFYQL | 0.67            |
|                                                | HLA-DPA1*01:03/DPB1*02:01 | 21    | 35  | LRFFVAPFPEVFGKE | 0.69            |
|                                                | HLA-DRB1*15:01            | 96    | 110 | EQLLRLKKYKVPQLE | 0.70            |
|                                                | HLA-DQA1*01:01/DQB1*05:01 | 145   | 159 | FYPELFRQFYQLDAY | 0.71            |
|                                                | HLA-DQA1*01:01/DQB1*05:01 | 17    | 31  | NENLLRFFVAPFPEV | 0.75            |
|                                                | HLA-DPA1*02:01/DPB1*05:01 | 143   | 157 | AYFYPELFRQFYQLD | 0.79            |
|                                                | HLA-DRB1*15:01            | 95    | 109 | LEQLLRLKKYKVPQL | 0.84            |
|                                                | HLA-DPA1*01:03/DPB1*02:01 | 139   | 153 | NQELAYFYPELFRQF | 0.84            |
|                                                | HLA-DPA1*01:03/DPB1*02:01 | 140   | 154 | QELAYFYPELFRQFY | 0.84            |
|                                                | HLA-DPA1*02:01/DPB1*14:01 | 17    | 31  | NENLLRFFVAPFPEV | 0.85            |
|                                                | HLA-DPA1*01:03/DPB1*02:01 | 141   | 155 | ELAYFYPELFRQFYQ | 0.86            |
|                                                | HLA-DQA1*01:01/DQB1*05:01 | 19    | 33  | NLLRFFVAPFPEVFG | 0.95            |
|                                                | HLA-DQA1*01:01/DQB1*05:01 | 16    | 30  | LNENLLRFFVAPFPE | 0.97            |

| <b>Protein</b>                                 | <b>Allele</b>             | <b>Start</b> | <b>End</b> | <b>Peptide</b>  | <b>Percentile Rank</b> |
|------------------------------------------------|---------------------------|--------------|------------|-----------------|------------------------|
| <b><math>\alpha</math><sub>S1</sub>-casein</b> | HLA-DRB1*12:01            | 92           | 106        | LGYLEQLLRLKKYKV | 1.06                   |
|                                                | HLA-DPA1*01:03/DPB1*02:01 | 143          | 157        | AYFYPELFRQFYQLD | 1.10                   |
|                                                | HLA-DQA1*01:01/DQB1*05:01 | 149          | 163        | LFRQFYQLDAYPSGA | 1.10                   |
|                                                | HLA-DPA1*01:03/DPB1*04:01 | 145          | 159        | FYPELFRQFYQLDAY | 1.20                   |
|                                                | HLA-DPA1*01:03/DPB1*04:01 | 16           | 30         | LNENLLRFFVAPFPE | 1.20                   |
|                                                | HLA-DPA1*02:01/DPB1*01:01 | 143          | 157        | AYFYPELFRQFYQLD | 1.30                   |
|                                                | HLA-DPA1*02:01/DPB1*01:01 | 89           | 103        | ERYLGYLEQLLRLKK | 1.30                   |
|                                                | HLA-DPA1*02:01/DPB1*01:01 | 88           | 102        | SERYLGYLEQLLRLK | 1.30                   |
|                                                | HLA-DPA1*02:01/DPB1*05:01 | 138          | 152        | VNQELAYFYPELFRQ | 1.30                   |
|                                                | HLA-DPA1*02:01/DPB1*01:01 | 18           | 32         | ENLLRFFVAPFPEVF | 1.40                   |
|                                                | HLA-DPA1*02:01/DPB1*01:01 | 20           | 34         | LLRFFVAPFPEVFGK | 1.40                   |
|                                                | HLA-DPA1*02:01/DPB1*01:01 | 21           | 35         | LRFFVAPFPEVFGKE | 1.40                   |
|                                                | HLA-DPA1*02:01/DPB1*01:01 | 19           | 33         | NLLRFFVAPFPEVFG | 1.40                   |
|                                                | HLA-DQA1*05:01/DQB1*02:01 | 139          | 153        | NQELAYFYPELFRQF | 1.40                   |
|                                                | HLA-DRB1*15:01            | 97           | 111        | QLLRLKKYKVPQLEI | 1.40                   |
|                                                | HLA-DPA1*01:03/DPB1*04:01 | 88           | 102        | SERYLGYLEQLLRLK | 1.40                   |

| <b>Protein</b>                                 | <b>Allele</b>             | <b>Start</b> | <b>End</b> | <b>Peptide</b>  | <b>Percentile Rank</b> |
|------------------------------------------------|---------------------------|--------------|------------|-----------------|------------------------|
| <b><math>\alpha</math><sub>S1</sub>-casein</b> | HLA-DQA1*05:01/DQB1*02:01 | 138          | 152        | VNQELAYFYPELFRQ | 1.40                   |
|                                                | HLA-DPA1*01:03/DPB1*02:01 | 144          | 158        | YFYPELFRQFYQLDA | 1.40                   |
|                                                | HLA-DPA1*02:01/DPB1*01:01 | 144          | 158        | YFYPELFRQFYQLDA | 1.40                   |
|                                                | HLA-DQA1*01:01/DQB1*05:01 | 141          | 155        | ELAYFYPELFRQFYQ | 1.50                   |
|                                                | HLA-DPA1*03:01/DPB1*04:02 | 89           | 103        | ERYLGYLEQLLRLKK | 1.50                   |
|                                                | HLA-DQA1*05:01/DQB1*02:01 | 137          | 151        | GVNQELAYFYPELFR | 1.50                   |
|                                                | HLA-DQA1*03:01/DQB1*03:02 | 57           | 71         | IKQMEAESISSSEEI | 1.50                   |
|                                                | HLA-DQA1*03:01/DQB1*03:02 | 58           | 72         | KQMEAESISSSEEIV | 1.50                   |
|                                                | HLA-DPA1*01:03/DPB1*04:01 | 87           | 101        | PSERYLGYLEQLLRL | 1.50                   |
|                                                | HLA-DPA1*02:01/DPB1*01:01 | 87           | 101        | PSERYLGYLEQLLRL | 1.50                   |
|                                                | HLA-DQA1*03:01/DQB1*03:02 | 59           | 73         | QMEAESISSSEEIVP | 1.50                   |
|                                                | HLA-DPA1*03:01/DPB1*04:02 | 88           | 102        | SERYLGYLEQLLRLK | 1.50                   |
|                                                | HLA-DRB1*04:05            | 162          | 176        | GAWYYVPLGTQYTDA | 1.60                   |
|                                                | HLA-DQA1*05:01/DQB1*02:01 | 136          | 150        | IGVNQELAYFYPELF | 1.60                   |
|                                                | HLA-DRB1*01:01            | 149          | 163        | LFRQFYQLDAYPSGA | 1.60                   |
|                                                | HLA-DRB1*15:01            | 98           | 112        | LLRLKKYKVPQLEIV | 1.60                   |

| <b>Protein</b>                                 | <b>Allele</b>             | <b>Start</b> | <b>End</b> | <b>Peptide</b>  | <b>Percentile Rank</b> |
|------------------------------------------------|---------------------------|--------------|------------|-----------------|------------------------|
| <b><math>\alpha</math><sub>S1</sub>-casein</b> | HLA-DPA1*03:01/DPB1*04:02 | 87           | 101        | PSERYLGYLEQLLRL | 1.60                   |
|                                                | HLA-DPA1*03:01/DPB1*04:02 | 90           | 104        | RYLGYLEQLLRLKKY | 1.60                   |
|                                                | HLA-DRB1*04:05            | 163          | 177        | AWYYVPLGTQYTDAP | 1.70                   |
|                                                | HLA-DQA1*05:01/DQB1*02:01 | 18           | 32         | ENLLRFFVAPFPEVF | 1.70                   |
|                                                | HLA-DPA1*01:03/DPB1*04:01 | 89           | 103        | ERYLGYLEQLLRLKK | 1.70                   |
|                                                | HLA-DPA1*01:03/DPB1*04:01 | 136          | 150        | IGVNQELAYFYPELF | 1.70                   |
|                                                | HLA-DPA1*02:01/DPB1*01:01 | 17           | 31         | NENLLRFFVAPFPEV | 1.70                   |
|                                                | HLA-DQA1*05:01/DQB1*02:01 | 19           | 33         | NLLRFFVAPFPEVFG | 1.70                   |
|                                                | HLA-DRB1*04:05            | 161          | 175        | SGAWYYVPLGTQYTD | 1.70                   |
|                                                | HLA-DRB1*01:01            | 148          | 162        | ELFRQFYQLDAYPSG | 1.80                   |
|                                                | HLA-DRB1*01:01            | 150          | 164        | FRQFYQLDAYPSGAW | 1.80                   |
|                                                | HLA-DRB1*04:05            | 147          | 161        | PELFRQFYQLDAYPS | 1.80                   |
|                                                | HLA-DRB1*01:01            | 151          | 165        | RQFYQLDAYPSGAWY | 1.80                   |
|                                                | HLA-DPA1*03:01/DPB1*04:02 | 91           | 105        | YLGYLEQLLRLKKYK | 1.80                   |
|                                                | HLA-DRB1*04:05            | 148          | 162        | ELFRQFYQLDAYPSG | 1.90                   |
|                                                | HLA-DRB1*04:05            | 105          | 119        | KVPQLEIVPNSAEER | 1.90                   |

| <b>Protein</b>                                 | <b>Allele</b>             | <b>Start</b> | <b>End</b> | <b>Peptide</b>  | <b>Percentile Rank</b> |
|------------------------------------------------|---------------------------|--------------|------------|-----------------|------------------------|
| <b><math>\alpha</math><sub>S1</sub>-casein</b> | HLA-DRB1*04:05            | 103          | 117        | KYKVPQLEIVPNSAE | 1.90                   |
|                                                | HLA-DRB1*04:05            | 107          | 121        | PQLEIVPNSAEERLH | 1.90                   |
|                                                | HLA-DPA1*01:03/DPB1*02:01 | 138          | 152        | VNQELAYFYPELFRQ | 1.90                   |
|                                                | HLA-DRB1*04:05            | 106          | 120        | VPQLEIVPNSAEERL | 1.90                   |
|                                                | HLA-DRB1*04:05            | 104          | 118        | YKVPQLEIVPNSAEE | 1.90                   |
|                                                | HLA-DQA1*01:01/DQB1*05:01 | 150          | 164        | FRQFYQLDAYPSGAW | 2.00                   |
|                                                | HLA-DPA1*01:03/DPB1*02:01 | 145          | 159        | FYPELFRQFYQLDAY | 2.00                   |
|                                                | HLA-DQA1*01:01/DQB1*05:01 | 20           | 34         | LLRFFVAPFPEVFGK | 2.00                   |
|                                                | HLA-DQA1*01:01/DQB1*05:01 | 87           | 101        | PSERYLGYLEQLLRL | 2.00                   |
|                                                | HLA-DPA1*02:01/DPB1*01:01 | 90           | 104        | RYLGYLEQLLRLKKY | 2.00                   |
|                                                | HLA-DQA1*01:01/DQB1*05:01 | 88           | 102        | SERYLGYLEQLLRLK | 2.00                   |
|                                                | HLA-DQA1*05:01/DQB1*02:01 | 20           | 34         | LLRFFVAPFPEVFGK | 2.10                   |
|                                                | HLA-DPA1*01:03/DPB1*04:01 | 90           | 104        | RYLGYLEQLLRLKKY | 2.10                   |
|                                                | HLA-DRB1*15:01            | 94           | 108        | YLEQLLRLKKYKVPQ | 2.10                   |
|                                                | HLA-DQA1*03:01/DQB1*03:02 | 56           | 70         | DIKQMEAESISSEE  | 2.20                   |
|                                                | HLA-DRB1*11:01            | 94           | 108        | YLEQLLRLKKYKVPQ | 2.20                   |

| Protein                                        | Allele                    | Start | End | Peptide         | Percentile Rank |
|------------------------------------------------|---------------------------|-------|-----|-----------------|-----------------|
| <b><math>\alpha</math><sub>S1</sub>-casein</b> | HLA-DRB1*12:01            | 93    | 107 | GYLEQLLRLKKYKVP | 2.27            |
|                                                | HLA-DRB1*11:01            | 93    | 107 | GYLEQLLRLKKYKVP | 2.30            |
|                                                | HLA-DQA1*01:01/DQB1*05:01 | 15    | 29  | VLNENLLRFFVAPFP | 2.30            |
|                                                | HLA-DQA1*05:01/DQB1*02:01 | 140   | 154 | QELAYFYPELFRQFY | 2.40            |
|                                                | HLA-DPA1*02:01/DPB1*14:01 | 22    | 36  | RFFVAPFPEVFGKEK | 2.40            |
|                                                | HLA-DQA1*01:01/DQB1*05:01 | 86    | 100 | VPSERYLGYLEQLLR | 2.40            |
|                                                | HLA-DRB1*12:01            | 94    | 108 | YLEQLLRLKKYKVPQ | 2.47            |
|                                                | HLA-DQA1*01:01/DQB1*05:01 | 85    | 99  | DVPSERYLGYLEQLL | 2.50            |
|                                                | HLA-DRB1*09:01            | 18    | 32  | ENLLRFFVAPFPEVF | 2.50            |
|                                                | HLA-DQA1*04:01/DQB1*04:02 | 57    | 71  | IKQMEAESISSSEEI | 2.50            |
|                                                | HLA-DQA1*04:01/DQB1*04:02 | 58    | 72  | KQMEAESISSSEEIV | 2.50            |
|                                                | HLA-DRB1*11:01            | 95    | 109 | LEQLLRLKKYKVPQL | 2.50            |
|                                                | HLA-DRB1*09:01            | 19    | 33  | NLLRFFVAPFPEVFG | 2.50            |
|                                                | HLA-DRB1*04:05            | 164   | 178 | WYYVPLGTQYTDAPS | 2.60            |
|                                                | HLA-DQA1*01:01/DQB1*05:01 | 89    | 103 | ERYLGYLEQLLRLKK | 2.70            |
|                                                | HLA-DQA1*05:01/DQB1*02:01 | 21    | 35  | LRFFVAPFPEVFGKE | 2.70            |

| <b>Protein</b>                         | <b>Allele</b>             | <b>Start</b> | <b>End</b> | <b>Peptide</b>  | <b>Percentile Rank</b> |
|----------------------------------------|---------------------------|--------------|------------|-----------------|------------------------|
|                                        | HLA-DQA1*01:01/DQB1*05:01 | 90           | 104        | RYLGYLEQLLRLKKY | 2.70                   |
|                                        | HLA-DRB1*12:01            | 14           | 28         | EVLNENLLRFFVAPF | 2.75                   |
|                                        | HLA-DRB1*04:05            | 18           | 32         | ENLLRFFVAPFPEVF | 2.80                   |
|                                        | HLA-DPA1*01:03/DPB1*04:01 | 14           | 28         | EVLNENLLRFFVAPF | 2.80                   |
|                                        | HLA-DRB1*15:01            | 93           | 107        | GYLEQLLRLKKYKVP | 2.80                   |
|                                        | HLA-DPA1*01:03/DPB1*02:01 | 22           | 36         | RFFVAPFPEVFGKEK | 2.80                   |
|                                        | HLA-DQA1*05:01/DQB1*02:01 | 86           | 100        | VPSELYLGYLEQLLR | 2.80                   |
|                                        | HLA-DRB1*04:01            | 150          | 164        | FRQFYQLDAYPSGAW | 2.90                   |
|                                        | HLA-DQA1*03:01/DQB1*03:02 | 60           | 74         | MEAESISSSEEIVPN | 2.90                   |
|                                        | HLA-DQA1*04:01/DQB1*04:02 | 59           | 73         | QMEAESISSSEEIVP | 2.90                   |
|                                        | HLA-DPA1*01:03/DPB1*04:01 | 15           | 29         | VLNENLLRFFVAPFP | 2.90                   |
|                                        | HLA-DRB1*12:01            | 91           | 105        | YLGYLEQLLRLKKYK | 2.90                   |
|                                        | HLA-DRB1*11:01            | 92           | 106        | LGYLEQLLRLKKYKV | 3.00                   |
|                                        | HLA-DPA1*01:03/DPB1*02:01 | 146          | 160        | YPELFRQFYQLDAYP | 3.00                   |
| <b>Protein</b>                         | <b>Allele</b>             | <b>Start</b> | <b>End</b> | <b>Peptide</b>  | <b>Percentile Rank</b> |
| <b><math>\alpha_{S2}</math>-casein</b> | HLA-DQA1*03:01/DQB1*03:02 | 55           | 69         | GSSSEESAEVATEEV | 0.09                   |

| Protein                                | Allele                    | Start | End | Peptide         | Percentile Rank |
|----------------------------------------|---------------------------|-------|-----|-----------------|-----------------|
| <b><math>\alpha_{S2}</math>-casein</b> | HLA-DQA1*03:01/DQB1*03:02 | 57    | 71  | SSEESAEVATEEVKI | 0.10            |
|                                        | HLA-DQA1*03:01/DQB1*03:02 | 56    | 70  | SSSEESAEVATEEVK | 0.10            |
|                                        | HLA-DQA1*04:01/DQB1*04:02 | 55    | 69  | GSSSEESAEVATEEV | 0.11            |
|                                        | HLA-DQA1*04:01/DQB1*04:02 | 54    | 68  | IGSSSEESAEVATEE | 0.11            |
|                                        | HLA-DQA1*03:01/DQB1*03:02 | 54    | 68  | IGSSSEESAEVATEE | 0.16            |
|                                        | HLA-DQA1*04:01/DQB1*04:02 | 56    | 70  | SSSEESAEVATEEVK | 0.16            |
|                                        | HLA-DQA1*04:01/DQB1*04:02 | 57    | 71  | SSEESAEVATEEVKI | 0.19            |
|                                        | HLA-DQA1*04:01/DQB1*04:02 | 58    | 72  | SEESAEVATEEVKIT | 0.40            |
|                                        | HLA-DPA1*01:03/DPB1*04:01 | 170   | 184 | RYQKFALPQYLKTVY | 0.43            |
|                                        | HLA-DRB1*12:01            | 158   | 172 | KNRLNFLKKISQRYQ | 0.44            |
|                                        | HLA-DRB1*11:01            | 158   | 172 | KNRLNFLKKISQRYQ | 0.52            |
|                                        | HLA-DQA1*03:01/DQB1*03:02 | 58    | 72  | SEESAEVATEEVKIT | 0.53            |
|                                        | HLA-DRB1*11:01            | 159   | 173 | NRLNFLKKISQRYQK | 0.57            |
|                                        | HLA-DQA1*03:01/DQB1*03:02 | 59    | 73  | EESAEVATEEVKITV | 0.60            |
|                                        | HLA-DRB1*12:01            | 159   | 173 | NRLNFLKKISQRYQK | 0.61            |
|                                        | HLA-DPA1*01:03/DPB1*04:01 | 171   | 185 | YQKFALPQYLKTVYQ | 0.61            |



| Protein               | Allele                    | Start | End | Peptide           | Percentile Rank |
|-----------------------|---------------------------|-------|-----|-------------------|-----------------|
| $\alpha_{S2}$ -casein | HLA-DPA1*01:03/DPB1*04:01 | 169   | 183 | QRYQKFALPQYLKTV   | 0.62            |
|                       | HLA-DRB1*04:01            | 18    | 32  | ETYKQEKNNMAINPSK  | 0.71            |
|                       | HLA-DRB1*04:01            | 14    | 28  | IISQETYKQEKNNMAI  | 0.71            |
|                       | HLA-DRB1*04:01            | 15    | 29  | ISQETYKQEKNNMAIN  | 0.71            |
|                       | HLA-DRB1*04:01            | 17    | 31  | QETYKQEKNNMAINPS  | 0.71            |
|                       | HLA-DRB1*04:01            | 16    | 30  | SQETYKQEKNNMAINP  | 0.71            |
|                       | HLA-DRB1*04:01            | 19    | 33  | TYKQEKNNMAINPSKE  | 0.71            |
|                       | HLA-DRB1*11:01            | 157   | 171 | EKNRLNFLKKISQRY   | 0.73            |
|                       | HLA-DRB1*12:01            | 157   | 171 | EKNRLNFLKKISQRY   | 0.76            |
|                       | HLA-DQA1*03:01/DQB1*03:02 | 53    | 67  | SIGSSSEESAEEVATE  | 0.86            |
|                       | HLA-DRB1*12:01            | 160   | 174 | RLNFLKKISQRYQKF   | 0.87            |
|                       | HLA-DRB1*11:01            | 155   | 169 | EEEKNRLNFLKKISQ   | 0.90            |
|                       | HLA-DRB1*11:01            | 156   | 170 | EEKNRLNFLKKISQR   | 0.90            |
|                       | HLA-DRB1*11:01            | 160   | 174 | RLNFLKKISQRYQKF   | 0.90            |
|                       | HLA-DQA1*04:01/DQB1*04:02 | 59    | 73  | EESAEEVATEEEVKITV | 1.10            |
|                       | HLA-DQA1*04:01/DQB1*04:02 | 53    | 67  | SIGSSSEESAEEVATE  | 1.20            |

| <b>Protein</b>                         | <b>Allele</b>             | <b>Start</b> | <b>End</b> | <b>Peptide</b>  | <b>Percentile Rank</b> |
|----------------------------------------|---------------------------|--------------|------------|-----------------|------------------------|
| <b><math>\alpha_{S2}</math>-casein</b> | HLA-DRB1*11:01            | 161          | 175        | LNFLKKISQRYQKFA | 1.30                   |
|                                        | HLA-DPA1*01:03/DPB1*04:01 | 168          | 182        | SQRYQKFALPQYLKT | 1.40                   |
|                                        | HLA-DRB1*12:01            | 161          | 175        | LNFLKKISQRYQKFA | 1.47                   |
|                                        | HLA-DQA1*03:01/DQB1*03:02 | 6            | 20         | HVSSSEESIISQETY | 1.50                   |
|                                        | HLA-DQA1*03:01/DQB1*03:02 | 8            | 22         | SSSEESIISQETYKQ | 1.60                   |
|                                        | HLA-DQA1*03:01/DQB1*03:02 | 7            | 21         | VSSSEESIISQETYK | 1.60                   |
|                                        | HLA-DQA1*03:01/DQB1*03:02 | 5            | 19         | EHVSSSEESIISQET | 1.80                   |
|                                        | HLA-DPA1*01:03/DPB1*04:01 | 172          | 186        | QKFALPQYLKTVYQH | 2.00                   |
|                                        | HLA-DPA1*03:01/DPB1*04:02 | 172          | 186        | QKFALPQYLKTVYQH | 2.40                   |
|                                        | HLA-DPA1*03:01/DPB1*04:02 | 169          | 183        | QRYQKFALPQYLKTV | 2.40                   |
|                                        | HLA-DPA1*03:01/DPB1*04:02 | 170          | 184        | RYQKFALPQYLKTVY | 2.40                   |
|                                        | HLA-DPA1*03:01/DPB1*04:02 | 171          | 185        | YQKFALPQYLKTVYQ | 2.40                   |
|                                        | HLA-DRB1*08:02            | 161          | 175        | LNFLKKISQRYQKFA | 2.50                   |
|                                        | HLA-DRB1*08:02            | 159          | 173        | NRLNFLKKISQRYQK | 2.60                   |
|                                        | HLA-DRB4*01:01            | 160          | 174        | RLNFLKKISQRYQKF | 2.60                   |
|                                        | HLA-DRB1*08:02            | 160          | 174        | RLNFLKKISQRYQKF | 2.70                   |

| <b>Protein</b>                                 | <b>Allele</b>             | <b>Start</b> | <b>End</b> | <b>Peptide</b>   | <b>Percentile Rank</b> |
|------------------------------------------------|---------------------------|--------------|------------|------------------|------------------------|
| <b><math>\alpha</math><sub>S2</sub>-casein</b> | HLA-DQA1*03:01/DQB1*03:02 | 49           | 63         | EEEYSIGSSSEESAE  | 2.80                   |
|                                                | HLA-DRB1*08:02            | 158          | 172        | KNRLNFLKKISQRYQ  | 2.80                   |
|                                                | HLA-DRB1*08:02            | 162          | 176        | NFLKKISQRYQKFAL  | 2.80                   |
|                                                | HLA-DPA1*02:01/DPB1*01:01 | 169          | 183        | QRYQKFALPQYLKTV  | 2.80                   |
|                                                | HLA-DQA1*04:01/DQB1*04:02 | 50           | 64         | EEYSIGSSSEESAEV  | 2.90                   |
|                                                | HLA-DQA1*03:01/DQB1*03:02 | 48           | 62         | NEEEYSIGSSSEESA  | 2.90                   |
|                                                | HLA-DRB1*01:01            | 93           | 107        | PQYLQYLYQGPIVLN  | 2.90                   |
|                                                | HLA-DPA1*02:01/DPB1*01:01 | 168          | 182        | SQRYQKFALPQYLKT  | 2.90                   |
| <b>Protein</b>                                 | <b>Allele</b>             | <b>Start</b> | <b>End</b> | <b>Peptide</b>   | <b>Percentile Rank</b> |
| <b><math>\beta</math>-casein</b>               | HLA-DRB1*07:01            | 159          | 173        | PQSVLSLSQSKVLPV  | 0.40                   |
|                                                | HLA-DRB1*07:01            | 160          | 174        | QSVLSLSQSKVLPVP  | 0.41                   |
|                                                | HLA-DRB1*07:01            | 161          | 175        | SVLSLSQSKVLPVPQ  | 0.51                   |
|                                                | HLA-DRB1*07:01            | 162          | 176        | VLSSLSQSKVLPVPQK | 0.80                   |
|                                                | HLA-DPA1*01:03/DPB1*04:01 | 185          | 199        | MPIQAFLLYQEPVLG  | 0.87                   |
|                                                | HLA-DPA1*01:03/DPB1*04:01 | 184          | 198        | DMPIQAFLLYQEPVL  | 0.88                   |
|                                                | HLA-DRB1*07:01            | 113          | 127        | KYPVEPFTESQSLTL  | 0.94                   |

| <b>Protein</b>  | <b>Allele</b>             | <b>Start</b> | <b>End</b> | <b>Peptide</b>  | <b>Percentile Rank</b> |
|-----------------|---------------------------|--------------|------------|-----------------|------------------------|
| <b>β-casein</b> | HLA-DPA1*01:03/DPB1*04:01 | 186          | 200        | PIQAFLLYQEPVLGP | 0.95                   |
|                 | HLA-DQA1*01:01/DQB1*05:01 | 185          | 199        | MPIQAFLLYQEPVLG | 1.00                   |
|                 | HLA-DQA1*01:01/DQB1*05:01 | 184          | 198        | DMPIQAFLLYQEPVL | 1.10                   |
|                 | HLA-DRB1*07:01            | 157          | 171        | FPPQSVLSLSQSKVL | 1.10                   |
|                 | HLA-DPA1*01:03/DPB1*04:01 | 187          | 201        | IQAFLLYQEPVLGPV | 1.10                   |
|                 | HLA-DRB1*07:01            | 158          | 172        | PPQSVLSLSQSKVLP | 1.10                   |
|                 | HLA-DRB1*09:01            | 159          | 173        | PQSVLSLSQSKVLPV | 1.40                   |
|                 | HLA-DRB1*07:01            | 114          | 128        | YPVEPFTESQSLTLT | 1.50                   |
|                 | HLA-DRB1*09:01            | 160          | 174        | QSVLSLSQSKVLPVP | 1.70                   |
|                 | HLA-DQA1*01:01/DQB1*05:01 | 183          | 197        | RDMPIQAFLLYQEPV | 1.80                   |
|                 | HLA-DRB1*07:01            | 115          | 129        | PVEPFTESQSLTLTD | 2.00                   |
|                 | HLA-DRB1*09:01            | 161          | 175        | SVLSLSQSKVLPVPQ | 2.00                   |
|                 | HLA-DQA1*01:01/DQB1*05:01 | 187          | 201        | IQAFLLYQEPVLGPV | 2.10                   |
|                 | HLA-DRB1*01:01            | 188          | 202        | QAFLLYQEPVLGPVR | 2.10                   |
|                 | HLA-DRB1*07:01            | 116          | 130        | VEPFTESQSLTLTDV | 2.10                   |
|                 | HLA-DRB1*09:01            | 157          | 171        | FPPQSVLSLSQSKVL | 2.20                   |

| <b>Protein</b>  | <b>Allele</b>             | <b>Start</b> | <b>End</b> | <b>Peptide</b>  | <b>Percentile Rank</b> |
|-----------------|---------------------------|--------------|------------|-----------------|------------------------|
| <b>β-casein</b> | HLA-DQA1*01:01/DQB1*05:01 | 186          | 200        | PIQAFLLYQEPVLGP | 2.30                   |
|                 | HLA-DRB1*09:01            | 158          | 172        | PPQSVLSLSQSKVLP | 2.30                   |
|                 | HLA-DPA1*03:01/DPB1*04:02 | 123          | 137        | QSLTLTDVENLHLPL | 2.30                   |
|                 | HLA-DPA1*02:01/DPB1*01:01 | 184          | 198        | DMPIQAFLLYQEPVL | 2.40                   |
|                 | HLA-DPA1*02:01/DPB1*01:01 | 185          | 199        | MPIQAFLLYQEPVLG | 2.50                   |
|                 | HLA-DPA1*01:03/DPB1*04:01 | 183          | 197        | RDMPIQAFLLYQEPV | 2.50                   |
|                 | HLA-DRB1*07:01            | 117          | 131        | EPFTESQSLTLTDVE | 2.60                   |
|                 | HLA-DPA1*01:03/DPB1*04:01 | 188          | 202        | QAFLLYQEPVLGPVR | 2.60                   |
|                 | HLA-DPA1*03:01/DPB1*04:02 | 122          | 136        | SQSLTLTDVENLHLP | 2.60                   |
|                 | HLA-DRB1*15:01            | 184          | 198        | DMPIQAFLLYQEPVL | 2.70                   |
|                 | HLA-DRB1*07:01            | 163          | 177        | LSLSQSKVLPVPQKA | 2.70                   |
|                 | HLA-DRB1*01:01            | 187          | 201        | IQAFLLYQEPVLGPV | 2.80                   |
|                 | HLA-DRB1*15:01            | 187          | 201        | IQAFLLYQEPVLGPV | 2.80                   |
|                 | HLA-DRB1*04:05            | 9            | 23         | PGEIVESLSSSEESI | 2.80                   |
|                 | HLA-DQA1*05:01/DQB1*02:01 | 184          | 198        | DMPIQAFLLYQEPVL | 2.90                   |
|                 | HLA-DRB1*04:05            | 10           | 24         | GEIVESLSSSEESIT | 2.90                   |

| <b>Protein</b>  | <b>Allele</b>             | <b>Start</b> | <b>End</b> | <b>Peptide</b>  | <b>Percentile Rank</b> |
|-----------------|---------------------------|--------------|------------|-----------------|------------------------|
| <b>β-casein</b> | HLA-DRB1*15:01            | 185          | 199        | MPIQAFLLYQEPVLG | 2.90                   |
|                 | HLA-DQA1*04:01/DQB1*04:02 | 9            | 23         | PGEIVESLSSEESI  | 2.90                   |
|                 | HLA-DQA1*05:01/DQB1*02:01 | 186          | 200        | PIQAFLLYQEPVLGP | 2.90                   |
| <b>Protein</b>  | <b>Allele</b>             | <b>Start</b> | <b>End</b> | <b>Peptide</b>  | <b>Percentile Rank</b> |
| <b>κ-casein</b> | HLA-DRB3*01:01            | 12           | 26         | EKDERFFSDKIAKYI | 0.13                   |
|                 | HLA-DRB3*01:01            | 14           | 28         | DERFFSDKIAKYIPI | 0.15                   |
|                 | HLA-DRB3*01:01            | 13           | 27         | KDERFFSDKIAKYIP | 0.18                   |
|                 | HLA-DRB3*01:01            | 15           | 29         | ERFFSDKIAKYIPIQ | 0.20                   |
|                 | HLA-DRB1*15:01            | 26           | 40         | IPIQYVLSRYPSYGL | 0.22                   |
|                 | HLA-DRB1*15:01            | 28           | 42         | IQYVLSRYPSYGLNY | 0.28                   |
|                 | HLA-DRB1*15:01            | 27           | 41         | PIQYVLSRYPSYGLN | 0.29                   |
|                 | HLA-DRB1*15:01            | 29           | 43         | QYVLSRYPSYGLNYY | 0.33                   |
|                 | HLA-DRB1*15:01            | 30           | 44         | YVLSRYPSYGLNYYQ | 0.33                   |
|                 | HLA-DRB3*01:01            | 11           | 25         | CEKDERFFSDKIAKY | 0.34                   |
|                 | HLA-DRB4*01:01            | 20           | 34         | DKIAKYIPIQYVLSR | 0.38                   |
|                 | HLA-DRB4*01:01            | 21           | 35         | KIAKYIPIQYVLSRY | 0.38                   |

| <b>Protein</b>  | <b>Allele</b>  | <b>Start</b> | <b>End</b> | <b>Peptide</b>   | <b>Percentile Rank</b> |
|-----------------|----------------|--------------|------------|------------------|------------------------|
| <b>κ-casein</b> | HLA-DRB4*01:01 | 19           | 33         | SDKIAKYIPIQYVLS  | 0.45                   |
|                 | HLA-DRB5*01:01 | 102          | 116        | HLSFMAIPPKKNQDK  | 0.48                   |
|                 | HLA-DRB5*01:01 | 100          | 114        | HPHLSFMAIPPKKNQ  | 0.48                   |
|                 | HLA-DRB5*01:01 | 103          | 117        | LSFMAIPPKKNQDKT  | 0.48                   |
|                 | HLA-DRB5*01:01 | 101          | 115        | PHLSFMAIPPKKNQD  | 0.48                   |
|                 | HLA-DRB5*01:01 | 99           | 113        | PHPHLSFMAIPPKKN  | 0.48                   |
|                 | HLA-DRB3*01:01 | 16           | 30         | RFFSDKIAKYIPIQY  | 0.58                   |
|                 | HLA-DRB4*01:01 | 22           | 36         | IAKYIPIQYVLSRYP  | 0.63                   |
|                 | HLA-DRB4*01:01 | 18           | 32         | FSDKIAKYIPIQYVL  | 0.68                   |
|                 | HLA-DRB4*01:01 | 17           | 31         | FFSDKIAKYIPIQYV  | 0.75                   |
|                 | HLA-DRB3*02:02 | 73           | 87         | ILQWQVLSNTVPAKS  | 1.30                   |
|                 | HLA-DRB3*02:02 | 74           | 88         | LQWQVLSNTVPAKSC  | 1.30                   |
|                 | HLA-DRB4*01:01 | 68           | 82         | RSPAQILQWQVLSNT  | 1.50                   |
|                 | HLA-DRB3*02:02 | 75           | 89         | QWQVLSNTVPAKSCQ  | 1.60                   |
|                 | HLA-DRB4*01:01 | 69           | 83         | SPAQILQWQVLSNTV  | 1.70                   |
|                 | HLA-DRB5*01:01 | 55           | 69         | FLPYPPYYAKPAAVRS | 2.00                   |

| Protein         | Allele         | Start | End | Peptide         | Percentile Rank |
|-----------------|----------------|-------|-----|-----------------|-----------------|
| <b>κ-casein</b> | HLA-DRB5*01:01 | 58    | 72  | YPYYAKPAAVRSPAQ | 2.00            |
|                 | HLA-DRB4*01:01 | 23    | 37  | AKYIPIQYVLSRYPS | 2.10            |
|                 | HLA-DRB1*03:01 | 14    | 28  | DERFFSDKIAKYIPI | 2.10            |
|                 | HLA-DRB1*03:01 | 12    | 26  | EKDERFFSDKIAKYI | 2.10            |
|                 | HLA-DRB5*01:01 | 56    | 70  | LPYPYYAKPAAVRSP | 2.10            |
|                 | HLA-DRB5*01:01 | 57    | 71  | PYPYYAKPAAVRSPA | 2.10            |
|                 | HLA-DRB1*03:01 | 13    | 27  | KDERFFSDKIAKYIP | 2.20            |
|                 | HLA-DRB3*02:02 | 76    | 90  | WQVLSNTVPAKSCQA | 2.20            |
|                 | HLA-DRB3*02:02 | 72    | 86  | QILQWQVLSNTVPAK | 2.30            |
|                 | HLA-DRB4*01:01 | 67    | 81  | VRSPAQILQWQVLSN | 2.30            |
|                 | HLA-DRB1*15:01 | 31    | 45  | VLSRYPSYGLNYYQQ | 2.40            |
|                 | HLA-DRB1*15:01 | 32    | 46  | LSRYPSYGLNYYQQK | 2.50            |
|                 | HLA-DRB5*01:01 | 104   | 118 | SFMAIPPKNQDKTE  | 2.60            |
|                 | HLA-DRB1*03:01 | 11    | 25  | CEKDERFFSDKIAKY | 2.80            |
|                 | HLA-DRB1*03:01 | 15    | 29  | ERFFSDKIAKYIPIQ | 2.90            |
|                 | HLA-DRB5*01:01 | 54    | 68  | QFLPYPYYAKPAAVR | 2.90            |



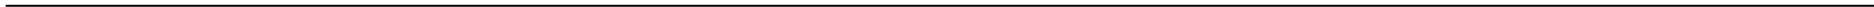

Supplement: d2fo02188a2.pdf [file d2fo02188a2.pdf]
