# Supplementary material for: Allergenicity evaluation of peptides from milk and yogurt after gastrointestinal digestion based on epitopes
Source: Royal Society of Chemistry journal article supplement (doi:10.1039/d2fo02188a), 2022-01-01

**Supplement Figure 1.** Cell viability of different concentrations (0.5, 1.0, 1.5, 2, 2.5 mg/ml) of gastrointestinal digestive products against Caco-2 cells by CCK-8 assay.

A: Gastrointestinal digestive products (pH 2, 3, 4, 5) of cow's milk in infants; B: Gastrointestinal digestive products (pH 2, 3, 4, 5) of yogurt in infants; C: Gastrointestinal digestive products (pH 1, 2, 3, 4) of cow's milk in adults; D: Gastrointestinal digestive products (pH 1, 2, 3, 4) of yogurt in adults.

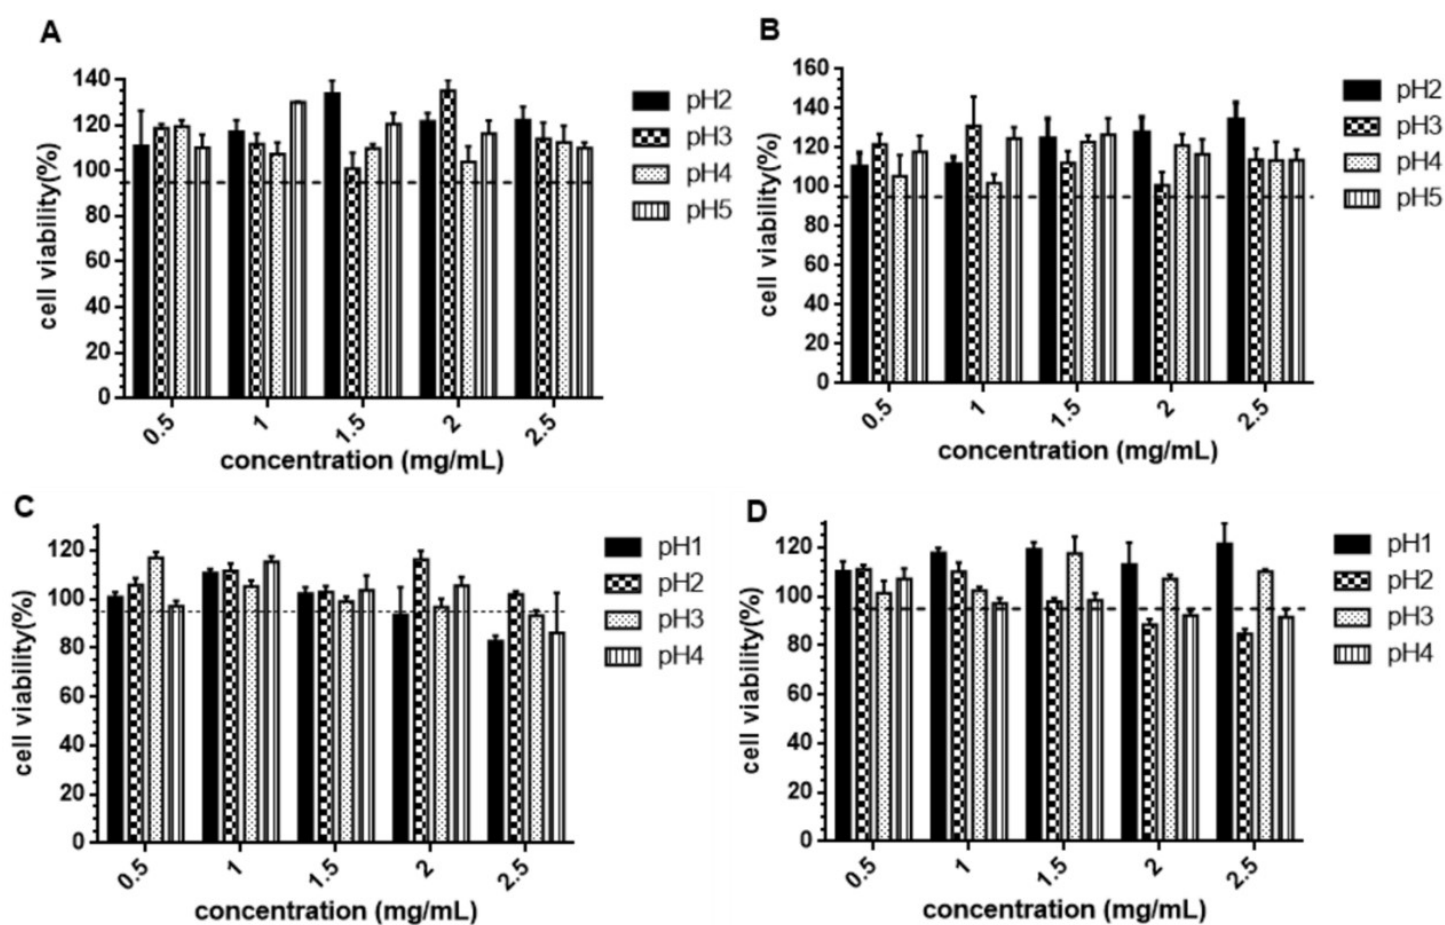

Supplement: d2fo02188a1.pdf [file d2fo02188a1.pdf]
